# Supplementary material
Source: PubMed Central journal article supplement (PMC3982204)

| <b>Band</b> | <b>Protein score</b> | <b>Unique peptides</b> | <b>Peptide sequence</b>                   |
|-------------|----------------------|------------------------|-------------------------------------------|
| 182a        | 3.99                 | 2                      | KWLLLSNAEDANAGAKG<br>RVGCLATIVEEATKL      |
| 182b        | 3.52                 | 2                      | KISEDDDYIPNTLNPVFGKM<br>KWLLLSNAEDANAGAKG |

**A**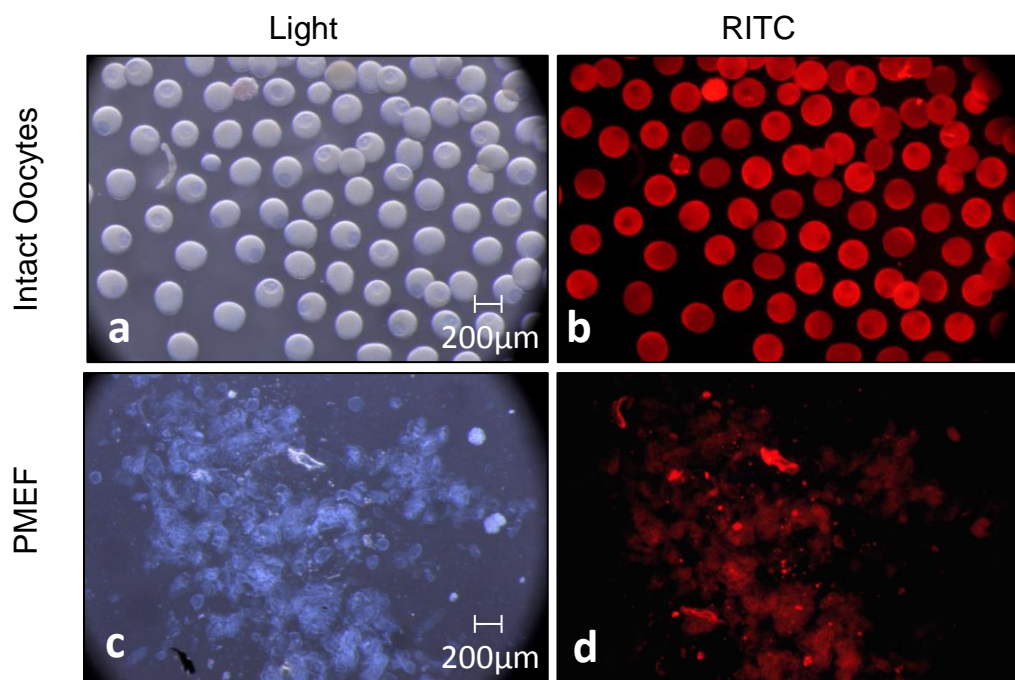**B**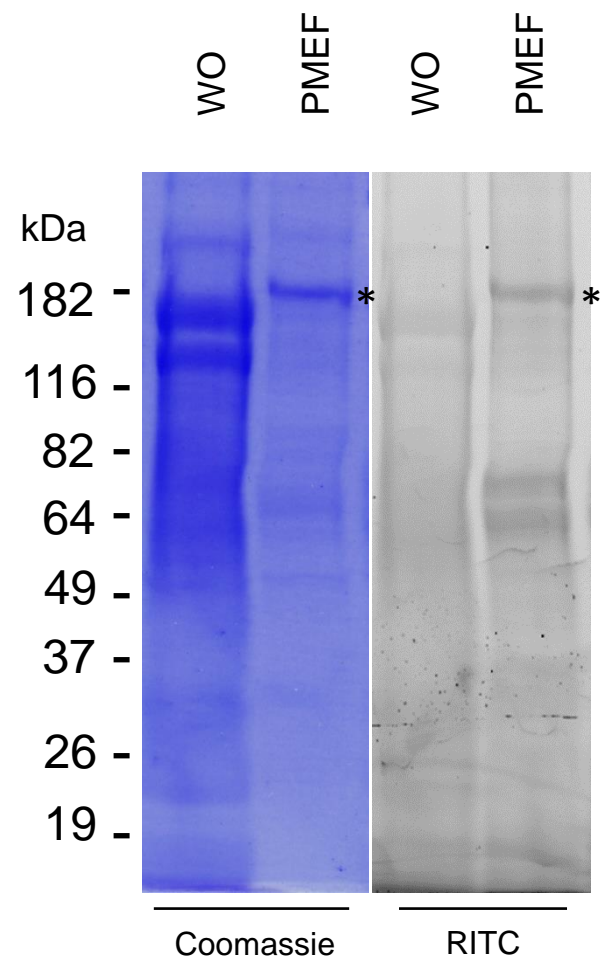

Figure S3

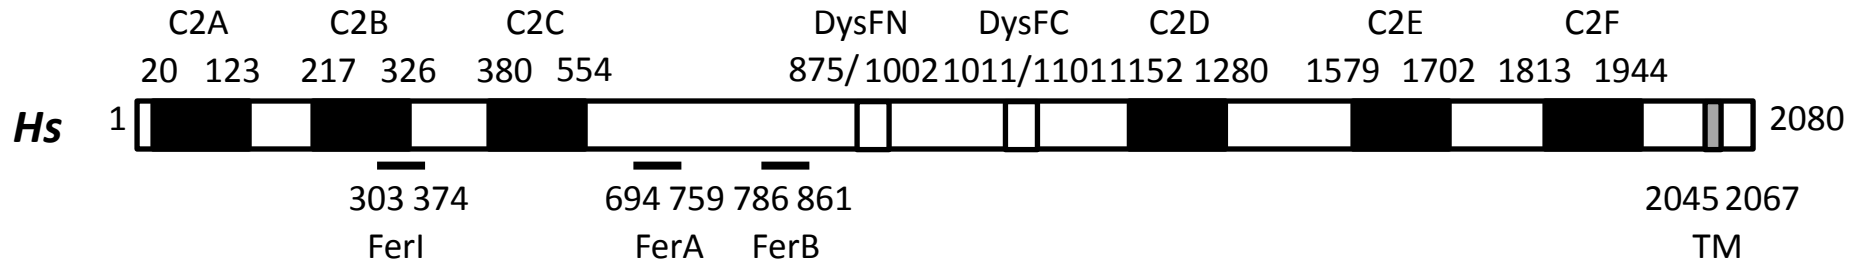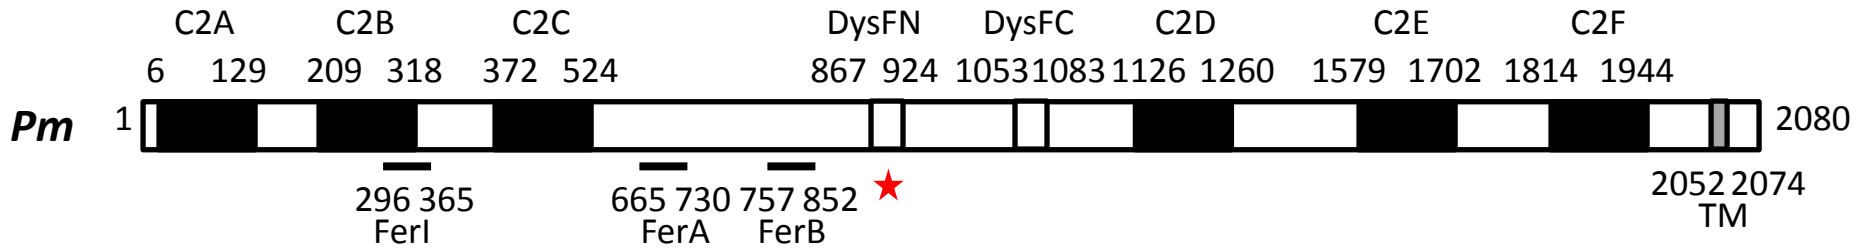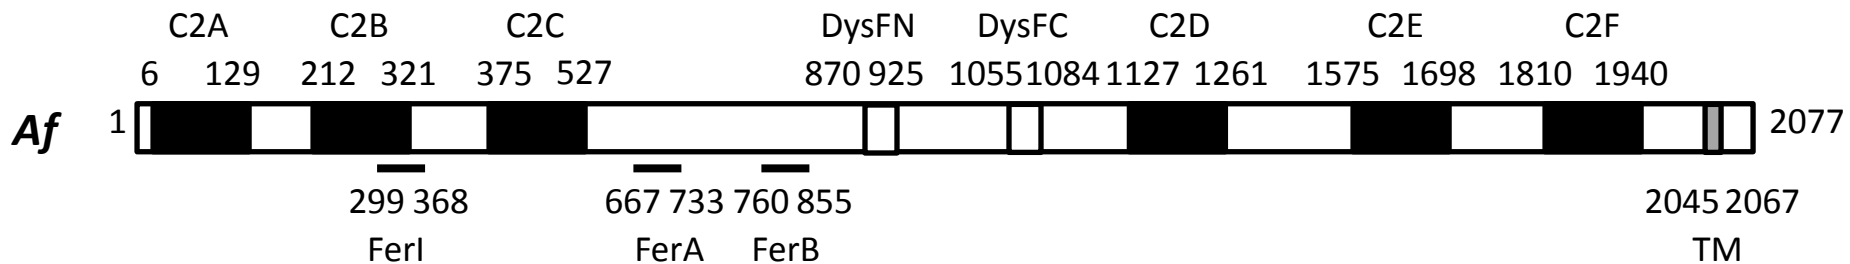

Supplement: NIHMS569746-supplement-01.pdf [file NIHMS569746-supplement-01.pdf]
